# Supplementary material for: Assessment of NO 2 uncertainty impact on aerosol optical depth retrievals at a global scale
Source: Copernicus journal article supplement (doi:10.5194/egusphere-2024-682), 2024-03-19
Supplement: Supplementary file [file egusphere-2024-682-AC1-supplement.pdf]

## Response to Reviewer's comments

### **General Comments:**

This is an interesting and potentially useful paper on the biases in AERONET computed AOD due the application of climatological monthly averages of nitrogen dioxide (NO<sub>2</sub>) from OMI satellite data versus coincident in time accurate measurements of column integrated NO<sub>2</sub> from ground-based Pandora instruments. However, there are several significant issues (listed as 1-5 below) that the authors need to address before this manuscript is published.

Comment 1: First, the manuscript title suggests an assessment on a global scale when in fact there are no sites analyzed in either Africa or Australia and only one site in the entire continent of South America (as shown in Figure 1). Except for 8 sites out of the 33 investigated all are in three regions: western Europe, eastern half of North America, and northeastern Asia. Therefore the analysis cannot be considered global. Additionally, it is noted that more than two thirds of the station pairs analyzed in this study (Table 1) are in urbanized regions or in cities that would have significantly higher NO<sub>2</sub> than rural sites (or small cities). It would be very useful to separately analyze the large urban and/or industrial region sites versus rural site data since the impact of accurate collocated NO<sub>2</sub> data from Pandora on AERONET AOD will clearly be much more significant for the sites in urban/industrial regions versus the rural sites. It is unlikely that ~70% of all AERONET sites in the entire network (not just those collocated with Pandora) are located in urban/industrial regions therefore separate analysis of these two categories of regions would be important and valuable. For simplicity I suggest possibly including small cities that are adjacent to rural land or ocean as 'rural' therefore Boulder and Comodoro would both be rural in that that definition. In my opinion other sites in the rural category would be Dalanzadgad, Davos, Innsbruck, Izana, Lindenburg, Ny-Alesund, and Wallops. Even though Julich is not a high population density place it is still in an industrialized region therefore I would not categorize it as rural.

Response 1: We are thankful to the reviewer for this valuable comment and suggestions.

Regarding the title and use of word "global": We agree with the reviewer and have revised the title as, "Assessment of **the impact of NO<sub>2</sub> contribution** on aerosol optical depth **measurements at several sites worldwide**"

Regarding Rural/Urban classification: This is an interesting suggestion proceeding with which we tried to divide the sites as rural and urban (Figure i below) wherever possible in the manuscript e.g., Figures 1, 2, 5, 7 and Tables 1, 3 in the updated version of the manuscript. We have also added the criterion used for this classification in Section 2.2.1 as follows in Line 157-159 and included some description in the text where possible e.g., Line 268-269, Line 307-308, Line 474, Line 477.

**"We have categorized all these stations as urban/rural site based on a simplified assumption that 'rural' corresponds to small cities that are in the countryside or adjacent to ocean and other sites as 'urban'."**

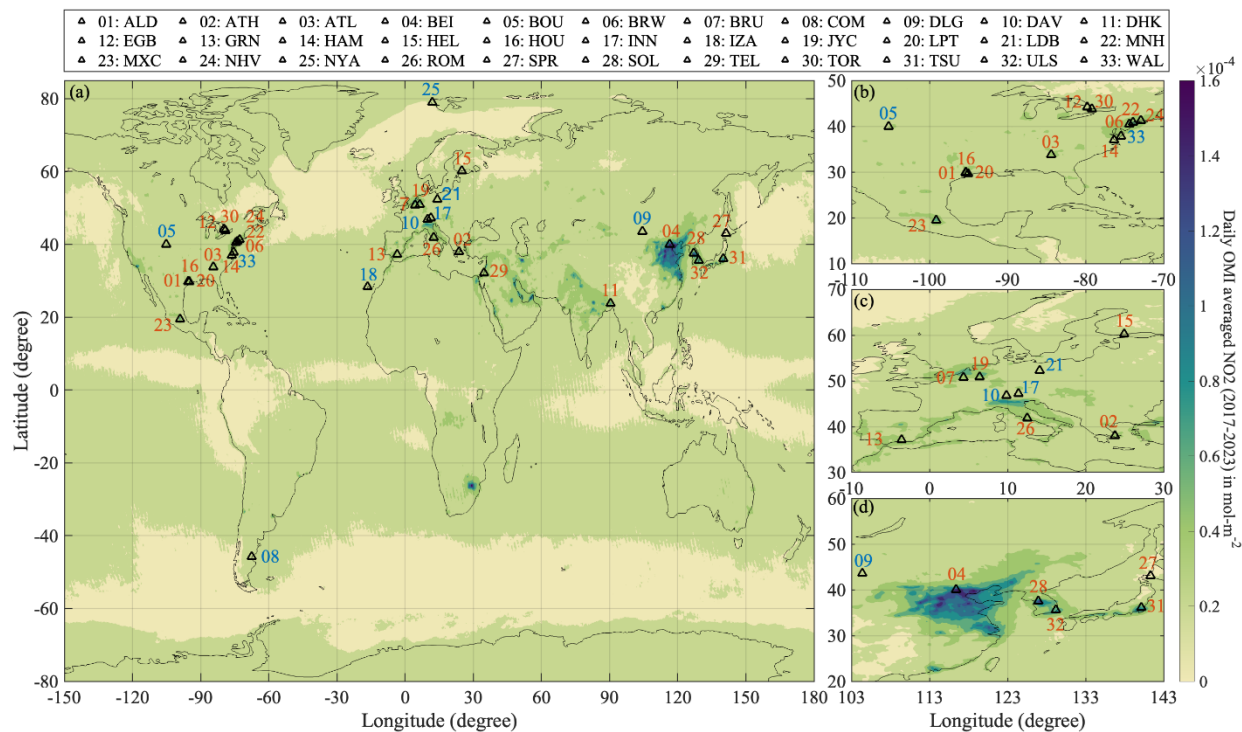

**Figure i: (a) Overview of the co-located AERONET and PGN stations and 7-year (2017-2023) averaged  $\text{NO}_2$  ( $\text{mol}\cdot\text{m}^{-2}$ ) from OMI satellite measurements. Panels (b), (c) and (d) are the focused maps for the clustered locations in North America, Europe and northeast Asia, respectively. Stations labelled in orange and blue are categorised as urban and rural sites, respectively.**

**Comment 2:** It is important to state in this paper that if PGN data were used to correct AERONET data then there would be discontinuities in the AERONET time series of AOD in both space and time since PGN data are not available for most years and most sites. Approximately 5-10% of AERONET sites currently have co-located PGN data and this decreases to 0% at the time before Pandora instruments existed and/or data are available.

**Response 2:** We agree with the reviewer with this concern. This work is more of an analysis of the effects that  $\text{NO}_2$  can have on the accuracy of AOD retrievals if not taken into account by using high frequency ground based  $\text{NO}_2$  measurements by Pandora instruments. However, concerning the correction in all of the AERONET stations data, only using Pandora for  $\text{NO}_2$  observation is not a feasible option. In this case, support from satellite data is also needed to account for the stations that don't yet have Pandora instruments and also concerning the times series of data availability from Pandora instruments that start from 2016 only. This analysis highlights the importance of having an improved  $\text{NO}_2$  optical depth estimation with the best possible scenario i.e., high frequency and accurate available  $\text{NO}_2$  measurements from Pandora instruments. Hence, the following lines have been added in the conclusion section of the updated manuscript in Lines 537-541,

**“This analysis highlights the importance of accurate  $\text{NO}_2$  optical depth representation with the best possible scenario (i.e., high frequency and accurate available  $\text{NO}_2$  measurements from Pandora instruments), however, concerning the  $\text{NO}_2$  absorption corrections in the global AOD networks (such as AERONET, GAW-PFR or SKYNET), synergistic use of satellite data is required to account for**

the stations that do not yet have Pandora instruments and also concerning the times series of data availability from Pandora instruments that start from 2016.”

Comment 3: Another aspect that needs to be emphasized in this manuscript is which AERONET measurement wavelengths are significantly affected and which are not affected by biases in column NO<sub>2</sub> amount, since NO<sub>2</sub> absorption does not impact all wavelengths equally. The AOD differences at AERONET measurement wavelengths other than 380 and 440 nm should also be given somewhere in this manuscript. If these are relatively small differences, then perhaps a table could provide the range of differences in AOD that occur when using the accurate PGN data instead of the OMic values for NO<sub>2</sub>. The AOD difference values at 340, 500, 675, 870, 1020 and 1640 nm should be provided in this paper at least in summary form.

Response 3: We thank the reviewer for this suggestion. We agree that NO<sub>2</sub> absorption does not impact all wavelengths equally. Since NO<sub>2</sub> absorption is significant in the UV-VIS spectral range and since NO<sub>2</sub> absorption correction is made at 340 nm, 380 nm, 440 nm and 500 nm in AERONET (Reference: Table 1 in Giles et al., 2019), we have considered these four wavelengths in the analysis. We have updated Figure 2 and 5 (below as Figure ii and iii, respectively) and accordingly Table 3 has been updated including NO<sub>2</sub> correction based AOD differences at 340 nm and 500 nm in the updated manuscript. It is evident that AOD bias is the most affected at 380 nm by NO<sub>2</sub> differences followed by 440 nm, 340 nm and 500 nm. We have added the following information in the updated manuscript in Lines 341-342.

“It is observed (from Fig. 2 and Fig. 5) that the most affected wavelength due to differences in NO<sub>2</sub> absorption representation in AOD calculations is 380 nm followed by 440 nm, 340 nm and 500 nm.”

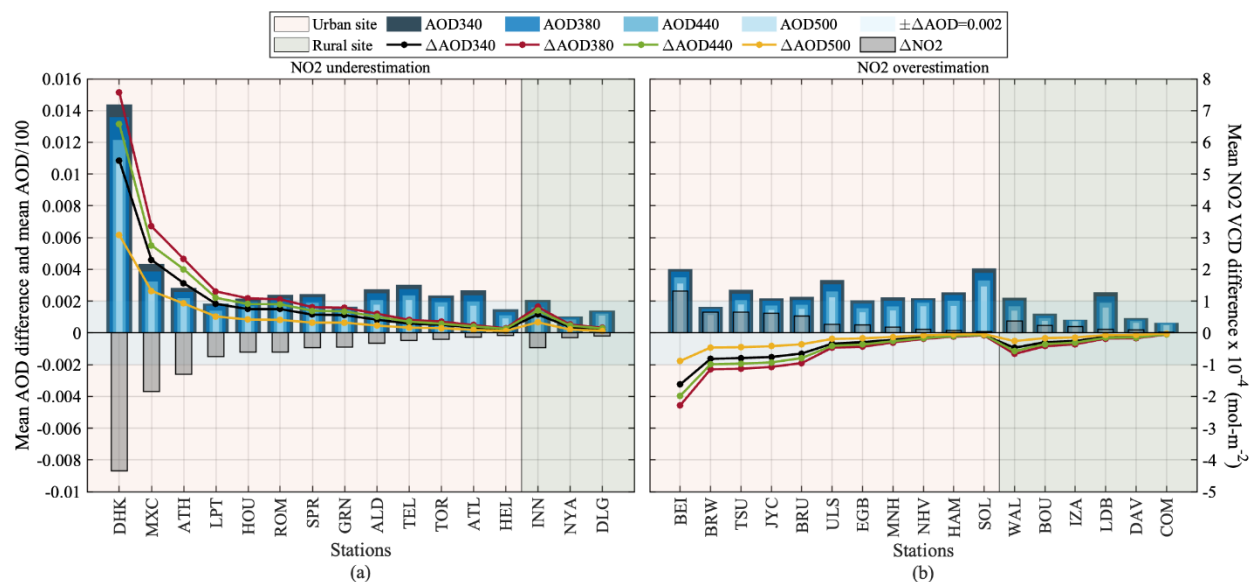

Figure ii: NO<sub>2</sub> VCD (mol-m<sup>-2</sup>) and AOD differences for all station with NO<sub>2</sub> (a) underestimation and (b) overestimation. The NO<sub>2</sub> differences are calculated as OMic – PGN and the corresponding AOD differences as original AERONET AOD – PGN corrected AOD.

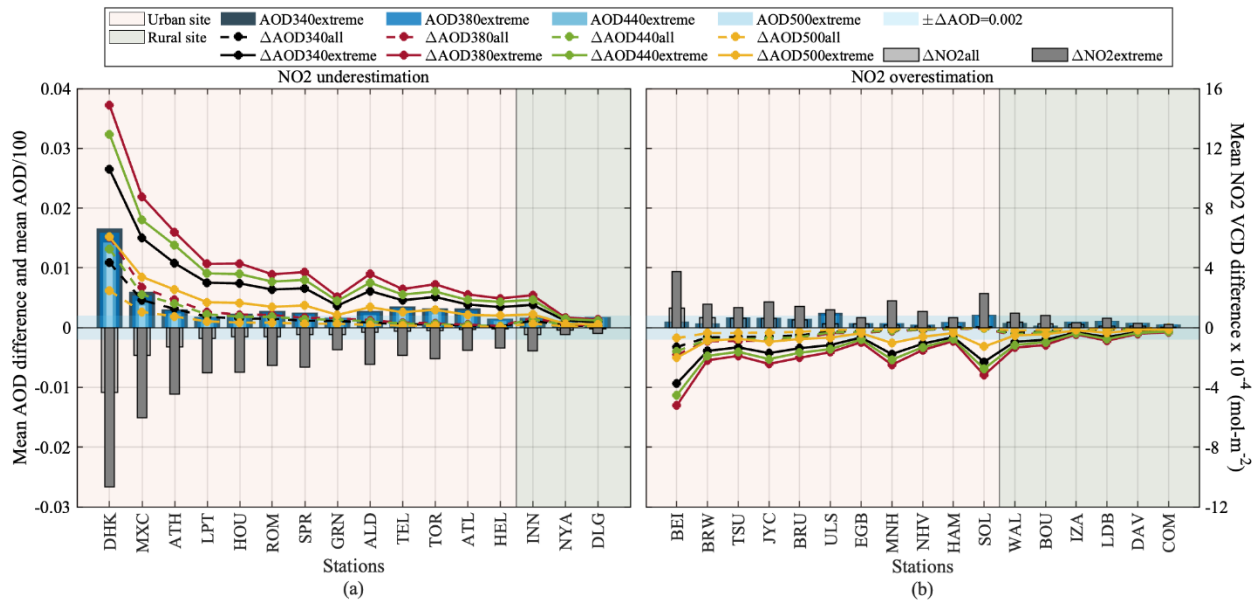

**Figure iii: Comparison of NO<sub>2</sub> VCD (mol·m<sup>-2</sup>) and AOD differences (OMIc - PGN) in extreme cases with 10% highest NO<sub>2</sub> (a) underestimation and (b) overestimation by OMIc as compared to all datasets.**

Comment 4: Regarding another important issue, you state on line 197: "...here we use 380–675 and 440–870 wavelength pairs for AE estimations". Note that the 2 wavelength computations of AE (that you have suggested are utilized in this paper) differ from the multi-wavelength computations of AE provided by AERONET. For AE(440-870 nm) the AERONET computation uses the 440, 500, 675 and 870 nm AOD and computes it from the linear regression in logarithmic coordinates using all 4 wavelengths. Your two wavelength computation of 440-870 AE gives more weight to the 440 nm AOD which has large NO<sub>2</sub> optical depth and therefore accentuates the AE change due to NO<sub>2</sub> variability versus the AE changes that would occur in the actual AERONET product of AE(440-870) with 4 wavelengths input. The AE in this manuscript should be recomputed using all AOD within the wavelength range in order to provide an accurate estimate of the changes to the standard AERONET product of AE(440-870). Otherwise you would need to specify in the text that for the AERONET computations of AE the changes due to Pandora input would be smaller as compared to your computations of AE with fewer wavelengths. Also note that AERONET does not compute the 380-675 nm AE as you do so this is also not an AE computed product that users would download in the AOD files from the AERONET web page. If the 380-675 nm AE values remain in the paper then you need to make this clear to the reader. All AE computations available from the AERONET web page utilize 3 or more wavelengths: all AOD values within the wavelength range specified.

Response 4: We would like to thank the reviewer for this suggestion. Following the reviewer's comment, we have updated the methodology as well as the wavelength pairs used for AE calculation. We now use the linear regression in logarithmic coordinates using all 4 and 3 wavelengths for AE440-870 and AE340-440, respectively. Instead of 380-675, we now use 340-440 as we have expanded the analysis of AOD from 380 nm and 440 nm to 340 nm, 380 nm, 440 nm and 500 nm (as described in Response 3). Therefore, Figure 8 in the updated manuscript has been corrected as below Fig. iv. Also, in the methodology, following correction is made in Lines 219-222.

“The negative slope of the least squares regression fit from Equation 7 is used by AERONET to retrieve AE (Eck et al., 1999) with AOD at all the wavelengths within the considered spectral ranges (here we use all three and four wavelengths within 340–440 and 440–870 wavelength pairs, respectively for AE estimations) as ....”

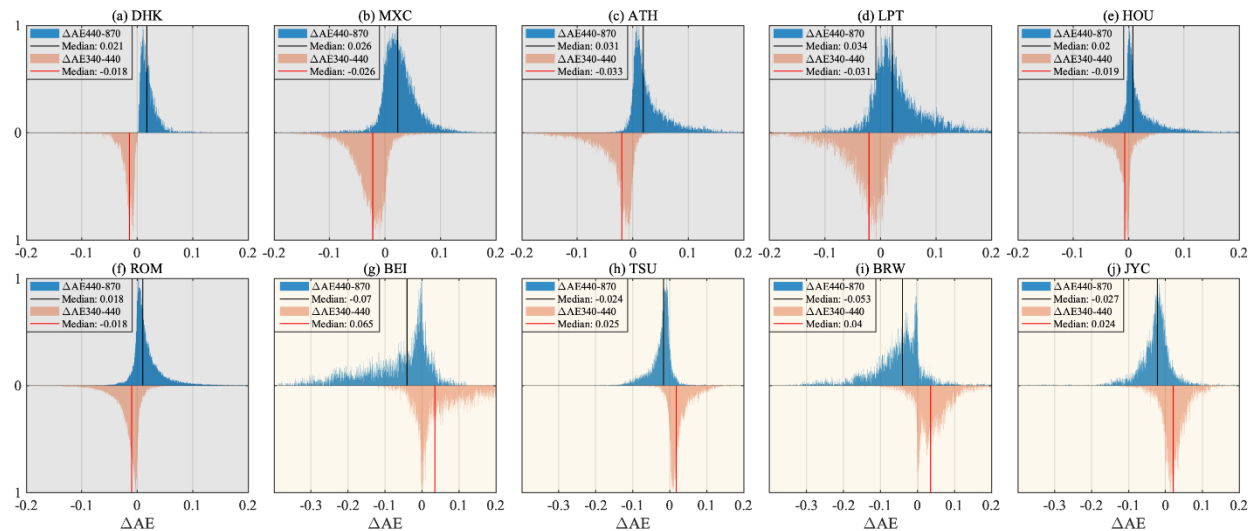

**Figure iv: Normalized frequency distributions of (a-j) the difference in AE at 440-870 nm and 340-440 nm retrieved from the AODs based on AERONET OMic and PGN NO<sub>2</sub>. Shaded background area represents NO<sub>2</sub> underestimation (grey) (a-f), and overestimation (yellow) (g-j) cases.**

Comment 5: Finally, it is important to know if the large differences in NO<sub>2</sub> between PGN and OMic occur at high levels of AOD especially for stations such as Dhaka, Mexico City, Beijing, Seoul and Athens. Scatterplots of AOD(440) versus delta(AOD 440 nm) due to NO<sub>2</sub> differences (PGN versus OMic) for each station individually would provide important information about the relative changes in AOD and not just the absolute differences in AOD that are currently provided in the paper. For example it is important to know if the largest NO<sub>2</sub> biases (when applying OMic) occur at the highest AOD levels and also if AOD(440) nm is correlated with total column NO<sub>2</sub> magnitude.

Response 5: We thank the reviewer for the comments. The large differences in NO<sub>2</sub> not necessarily occurs at high levels of AOD but is related to the difference in the climatological representation of NO<sub>2</sub> and the real scenario of high/low pollution levels for stations such as Dhaka, Mexico City, Beijing, Seoul and Athens. The scatterplot of AOD Vs ΔAOD due to NO<sub>2</sub> differences is added in the updated manuscript as Figure 4 (also below Fig. v) in order to provide information about the relative changes in AOD (We had this plot in the Appendix in the earlier version of the manuscript which we have now updated and moved to the main text as Figure 4). It is observed that the AOD differences is not correlated with the AOD values. AOD (at 440 nm) is not correlated with the NO<sub>2</sub> vertical column density magnitude as is observed from Figure 4 a-j. The NO<sub>2</sub> differences are related to the AOD differences and not to the magnitude of AOD as is presented in Equation 5 in the updated manuscript and also explained in Response 8 below.

We have added the following explanation in the updated manuscript in Lines 331-335.



“Figure 4 presents the scatterplot of AOD as a function of NO<sub>2</sub> VCD as well as AOD differences arising due to NO<sub>2</sub> differences at all considered wavelengths (340 nm, 380 nm, 440 nm and 500 nm). It is observed that AOD is not correlated with the NO<sub>2</sub> VCD magnitude as is observed from Fig. 4 a-j and the AOD differences is also not correlated with the AOD values (Fig. 4 k-t). The NO<sub>2</sub> differences are related to the AOD differences and vice versa and are not related to the magnitude of AOD or the magnitude of NO<sub>2</sub> VCD as is evident from Equation 5.”

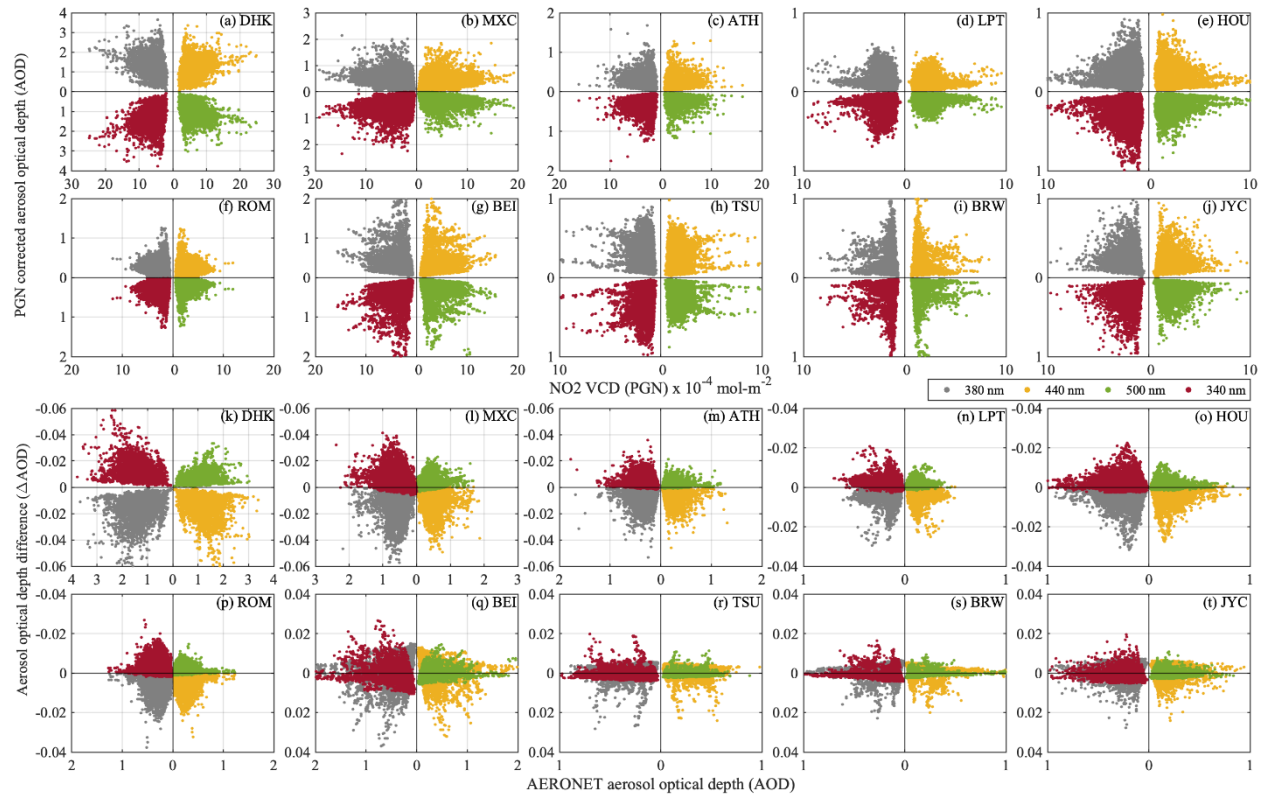

Figure v: (a-j) AOD as a function of NO<sub>2</sub> VCD (mol-m<sup>-2</sup>), and (k-t) AOD differences as a function of AOD at 340 nm, 380 nm, 440 nm and 500 nm for stations with mean NO<sub>2</sub> offset more than  $0.5 \times 10^{-4}$  mol-m<sup>-2</sup> and mean AOD differences offset above 0.002. For NO<sub>2</sub> underestimation cases (k-p),  $\Delta$ AOD below 0 for 340 nm and 500 nm and  $\Delta$ AOD above 0 for 380 nm and 440 nm represent positive AOD differences. For NO<sub>2</sub> overestimation cases (q-t),  $\Delta$ AOD below 0 for 340 nm and 500 nm and  $\Delta$ AOD above 0 for 380 nm and 440 nm represent negative AOD differences.

### Specific comments:

Comment 6: Line 20: AOD data are more accurately described as measurements, not retrievals.

AOD is more of a direct measurement by sunphotometers as distinguished from the AERONET retrievals of size distribution and complex refractive indices from the combined inputs of spectral directional sky radiances and spectral AOD.

Response 6: We thank the review for this suggestion. We have corrected this discrepancy throughout the manuscript specifically using “measurement” for AOD and “retrieval” for AE and SSA considering the fact that AOD is calculated from the direct sun measurements by sun photometers while parameters such as size

distribution, refractive indices, etc. are the products of Inversion algorithm from sky irradiance measurements. We have also corrected it in the title of the paper as mentioned in Response 1.

Author SK: However, it can be defined as retrieval too as sun photometers actually measure direct sun irradiance and then use calibration factors and post processing procedures (like this one here for NO<sub>2</sub>) to retrieve AOD.

Comment 7: Line 25: Please specify here in the Abstract which wavelengths are significantly affected and which are not, since NO<sub>2</sub> absorption does not impact all wavelengths equally.

Response 7: We thank the reviewer for this suggestion following which we have added the following lines in the abstract in the updated manuscript in Line 25-27 as is also mentioned in Response 3.

**“NO<sub>2</sub> absorption affect the AOD measurement in the UV-VIS range and we found that the AOD bias is the most affected at 380 nm by NO<sub>2</sub> differences followed by 440 nm, 340 nm and 500 nm.”**

Comment 8: Line 112: Again these are AOD measurements not retrievals such as from the sky radiance retrievals from the Dubovik algorithm. It is surprising that you utilized L1.5 data since final calibrations are not always applied yet and therefore the uncertainties are greater than for L2 data. Please explain in the text why L2 data were not utilized in this study, as it seems that most of the data were too recent (i.e. much 2023 data) to have post-deployment calibrations. The uncertainty of the L1.5 data that do not yet have final calibrations applied is ~2X greater (depending of length of field deployment) than that of L2 data (see Figure 20 in Giles et al., 2019). Please include this information in the text since many of the station data in Table 1 are for 2021-2023 only and therefore some may not include application of final calibrations to the data processing.

Response 8: We have corrected the confusion caused with the use of the word “retrieval” as also mentioned in Response 6.

We agree with the reviewer that upon implementation of final calibration, there can be changes (sometimes quite large) in AOD values with some instruments. However, the post-deployment calibrations in Level 2.0 data will not have an impact on this analysis of the NO<sub>2</sub> induced AOD differences as we have considered the relation between NO<sub>2</sub> difference and “AOD difference” as follows (details of these equations are available in the manuscript)

$$\tau_{\text{NO}_2}(\lambda) = \frac{\sigma_{\text{NO}_2}(\lambda)}{1000} * \frac{m_{\text{NO}_2}}{m_a} * \text{NO}_2 \quad (\text{i})$$

$$\tau_{\text{aer,PNG}}(\lambda) = \tau_{\text{aer,AERONET}}(\lambda) + \tau_{\text{NO}_2,\text{AERONET}}(\lambda) - \left( \tau_{\text{NO}_2,\text{AERONET}}(\lambda) * \frac{\text{NO}_{2\text{PNG}}}{\text{NO}_{2\text{OMIC}}} \right) = \tau_{\text{a,AERONET}}(\lambda) - \tau_{\text{NO}_2,\text{AERONET}}(\lambda) \left( \frac{\text{NO}_{2\text{PNG}}}{\text{NO}_{2\text{OMIC}}} - 1 \right) \quad (\text{ii})$$

$$\Delta\tau_{\text{aer}}(\lambda) = \tau_{\text{aer,AERONET}}(\lambda) - \tau_{\text{aer,PNG}}(\lambda) = \tau_{\text{NO}_2,\text{AERONET}}(\lambda) \left( \frac{\text{NO}_{2\text{PNG}}}{\text{NO}_{2\text{OMIC}}} - 1 \right) = - \frac{\tau_{\text{NO}_2,\text{AERONET}}(\lambda)}{\text{NO}_{2\text{OMIC}}} (\Delta\text{NO}_2) \quad (\text{iii})$$

Hence, this analysis of NO<sub>2</sub> difference induced “AOD differences” is independent of calibration changes. So, if the calibration is changed, it will increase/decrease total optical depth, thereby increasing/decreasing

the AOD values while the NO<sub>2</sub> optical depth will not be affected and hence, these NO<sub>2</sub> difference induced “AOD difference” will not change. We have also added the following explanation for the choice of Level 1.5 data in the manuscript in Line 202-208. Equation 3 and Equation 5 of the updated manuscript are above Equations i and iii, respectively.

**“It is also to note here that the post-deployment calibrations in Level 2.0 data will not have an impact on this analysis of the NO<sub>2</sub> induced differences on AOD differences as we have considered the relation between NO<sub>2</sub> difference and AOD difference (Equation 5) (also from Equation 3, the NO<sub>2</sub> optical depth is related to columnar NO<sub>2</sub> value and the other terms will be constant for one instrument at a time stamp or solar elevation and wavelength and is not dependent on the calibration). Therefore, we chose to use Level 1.5 data as described in Section 2.1.1 in order to have more comparison points for this analysis.”**

Comment 9: Line 138: Please give the range of distances between the AERONET and Pandora instruments for the 33 selected station pairs.

Response 9: We thank the reviewer for this suggestion. In the following Table i, we have added a column with an approximate distance between the collocated Cimel and Pandora instruments. In the revised manuscript, we added this column to Table A1. If the instruments are located in the same building, then the distance is zero which also corresponds to the zero difference in latitude and longitude provided in Columns 4 and 5 of Table i.

**Table i: Description of the 33 co-located AERONET and PGN stations. The distance of PGN site from AERONET site is mentioned in brackets with sign.**

| No.         | Location, Country     | Code | Station coordinates of AERONET ( $\pm$ PGN) |                |              | Approximate distance between instruments (km) *** | Years with coincident data | Comparison data points |
|-------------|-----------------------|------|---------------------------------------------|----------------|--------------|---------------------------------------------------|----------------------------|------------------------|
|             |                       |      | Latitude (°)                                | Longitude (°)  | Altitude (m) |                                                   |                            |                        |
| Urban sites |                       |      |                                             |                |              |                                                   |                            |                        |
| 1           | Aldine, USA           | ALD  | 29.90 (+0.00)                               | -95.33 (+0.00) | 20 (-12)     | <b>0.00</b>                                       | 2021-2023                  | 14607                  |
| 2           | Athens, Greece        | ATH  | 37.97 (+0.02)                               | 23.72 (+0.05)  | 130 (+0)     | <b>5.33</b>                                       | 2018-2021                  | 13089                  |
| 3           | Atlanta, USA          | ATL  | 33.78 (+0.00)                               | -84.40 (+0.00) | 294 (+16)    | <b>0.00</b>                                       | 2023                       | 10547                  |
| 4           | Beijing, China        | BEI  | 40.00 (+0.00)                               | 116.38 (+0.00) | 59 (+0)      | <b>0.00</b>                                       | 2021-2023                  | 7211                   |
| 5           | Brunswick, USA        | BRW  | 40.46 (+0.00)                               | -74.43 (+0.00) | 20 (-1)      | <b>0.00</b>                                       | 2022-2023                  | 9073                   |
| 6           | Brussels, Belgium     | BRU  | 50.78 (+0.02)                               | 4.35 (+0.01)   | 120 (-13)    | <b>1.76</b>                                       | 2020-2023                  | 6325                   |
| 7           | Dhaka, Bangladesh     | DHK  | 23.73 (+0.00)                               | 90.40 (+0.00)  | 34 (+0)      | <b>0.00</b>                                       | 2023                       | 4347                   |
| 8           | Egbert, Canada        | EGB  | 44.23 (+0.00)                               | -79.78 (+0.00) | 264 (-13)    | <b>0.00</b>                                       | 2018-2020                  | 17075                  |
| 9           | Granada, Spain        | GRN  | 37.16 (+0.00)                               | -3.60 (+0.00)  | 680 (+0)     | <b>0.00</b>                                       | 2023                       | 24222                  |
| 10          | Hampton, USA          | HAM  | 37.02 (+0.00)                               | -76.34 (+0.00) | 12 (+7)      | <b>0.00</b>                                       | 2022-2023                  | 14424                  |
| 11          | Helsinki, Norway      | HEL  | 60.21 (-0.01)                               | 24.96 (+0.00)  | 52 (+45)     | <b>0.03</b>                                       | 2017-2023                  | 8472                   |
| 12          | Houston, USA          | HOU  | 29.72 (+0.00)                               | -95.34 (+0.00) | 65 (-46)     | <b>0.00</b>                                       | 2021-2023                  | 17603                  |
| 13          | Julich/Joyce, Germany | JYC  | 50.91 (+0.00)                               | 6.41 (+0.00)   | 111 (-17)    | <b>0.00</b>                                       | 2019-2023                  | 9621                   |
| 14          | La Porte, USA         | LPT  | 29.67 (+0.00)                               | -95.06 (+0.00) | 7 (+15)      | <b>0.00</b>                                       | 2021-2022                  | 8434                   |
| 15          | Manhattan, USA        | MNH  | 40.82 (-0.01)                               | -73.95 (+0.00) | 100 (-66)    | <b>0.65</b>                                       | 2018-2023                  | 29230                  |
| 16          | Mexico City, Mexico   | MXC  | 19.33 (+0.00)                               | -99.18 (+0.00) | 2268 (+12)   | <b>0.00</b>                                       | 2018-2023                  | 26116                  |
| 17          | New Haven, USA        | NHV  | 41.30 (+0.00)                               | -72.90 (+0.00) | 2 (+2)       | <b>0.00</b>                                       | 2022-2023                  | 14880                  |
| 18          | Rome, Italy           | ROM  | 41.90 (+0.00)                               | 12.51 (+0.01)  | 75 (+0)      | <b>0.04</b>                                       | 2017-2023                  | 63759                  |
| 19          | Sapporo, Japan        | SPR  | 43.07 (+0.00)                               | 141.34 (+0.01) | 59 (-13)     | <b>0.46</b>                                       | 2022-2023                  | 8586                   |
| 20          | Seoul, South Korea    | SOL  | 37.46 (+0.00)                               | 126.95 (+0.00) | 116 (+0)     | <b>0.00</b>                                       | 2021-2023                  | <b>32010</b>           |
| 21          | Tel-Aviv, Israel      | TEL  | 32.11 (+0.00)                               | 34.81 (+0.00)  | 76 (+0)      | <b>0.02</b>                                       | 2021-2023                  | 50680                  |
| 22          | Toronto, Canada       | TOR  | 43.79 (-0.08)                               | -79.47 (+0.07) | 186 (-45)    | <b>10.73</b>                                      | 2019-2023                  | <b>14199</b>           |
| 23          | Tsukuba, Japan        | TSU  | 36.11 (-0.04)                               | 140.10 (+0.02) | 25 (+26)     | <b>5.89</b>                                       | 2021-2023                  | 17048                  |
| 24          | Ulsan, South Korea*   | ULS  | 35.58 (-0.01)                               | 129.19 (+0.00) | 106 (-68)    | <b>0.84</b>                                       | 2021-2023                  | 25745                  |
| Rural sites |                       |      |                                             |                |              |                                                   |                            |                        |



|    |                       |     |                |                 |            |             |           |       |
|----|-----------------------|-----|----------------|-----------------|------------|-------------|-----------|-------|
| 25 | Boulder, USA          | BOU | 40.04 (-0.05)  | -105.24 (-0.02) | 1622 (+38) | <b>0.10</b> | 2021-2023 | 25428 |
| 26 | Comodoro, Argentina   | COM | -45.79 (+0.01) | -67.46 (+0.01)  | 49 (-3)    | <b>1.40</b> | 2017-2021 | 12770 |
| 27 | Dalanzadgad, Mongolia | DLG | 43.58 (+0.00)  | 104.42 (+0.00)  | 1470 (-4)  | <b>0.00</b> | 2023      | 10556 |
| 28 | Davos, Switzerland*   | DAV | 46.81 (-0.01)  | 9.84 (-0.01)    | 1589 (+1)  | -           | 2017-2023 | 16773 |
| 29 | Innsbruck, Austria    | INN | 47.26 (+0.00)  | 11.38 (+0.00)   | 620 (-4)   | <b>0.00</b> | 2022-2023 | 8840  |
| 30 | Izana, Spain          | IZA | 28.31 (+0.00)  | -16.50 (+0.00)  | 2401 (-41) | <b>0.00</b> | 2022-2023 | 49862 |
| 31 | Lindenberg, Germany*  | LDB | 52.21 (+0.08)  | 14.12 (+0.00)   | 120 (+7)   | -           | 2019-2023 | 13447 |
| 32 | Ny-Ålesund, Norway    | NYA | 78.92 (+0.00)  | 11.92 (+0.01)   | 7 (+11)    | <b>0.15</b> | 2020-2023 | 21575 |
| 33 | Wallops, USA          | WAL | 37.93 (-0.09)  | -75.47 (-0.01)  | 37 (-26)   | <b>9.84</b> | 2021      | 7799  |

\*These sites are collocated (i.e., instruments are in the same building) but the coordinates (latitude/longitude/altitude) provided in AERONET/PGN have slight differences. This is verified with the station Principal Investigators.

Comment 10: Line 149: What was the maximum time difference that was accepted for the time matching? Please specify in the text of the manuscript.

Response 10: We thank the reviewer for the comment. We have performed the comparison between AERONET and PGN time stamps within a day (i.e., on a daily basis) and hence every comparison point is within a day. However, while accepting only points within a maximum of  $\pm 1$  min difference, the coincident comparison points obtained were very few. Hence, to maintain a balance between the accuracy and the number of comparison points, we first found the nearest matching time stamp of Pandora measurement corresponding to Aeronet time stamp within a day and then time interpolated the Pandora measurement to Aeronet time stamp. In this process, for every Aeronet measurement, we were able to retrieve the corresponding time interpolated Pandora NO<sub>2</sub> measurement. It is to note here that this is for diurnal variation of NO<sub>2</sub> which is anyways not possible with polar orbiting satellites such as OMI/TROPOMI and even with geostationary satellite the exact comparison time stamp will be very few. Hence, we have corrected the sentence in the manuscript in Line 153-155 as below

“Corresponding to every measurement of AERONET (time of measurement) **within a day**, the nearest matching PGN measurement (similar time of measurement) was selected and then the PGN data was time interpolated to the AERONET time stamp **for that day.**”

Comment 11: Line 168-170: Note that water vapor absorption is also subtracted from the 1020 nm total optical depth to get AOD at 1020 nm.

Response 11: We thank the reviewer for this suggestion. We have added this information in the updated manuscript as follows in Line 181-183

“Aerosol optical depth ( $\tau_{\text{aer}}$ ) is **calculated** from total optical depth ( $\tau$ ) by subtracting the optical depth contributions from Rayleigh scattering by molecules, gaseous absorption **and/or precipitable water vapour depending upon the wavelength.**”

Comment 12: Line 286-289: This should be supported with some trend data on NO<sub>2</sub> in Beijing from published literature (see Xu et al., 2023 in Atmospheric Environment) and with references included in the text. Similar references should be searched for Dhaka and provide the magnitudes of the observed changes in NO<sub>2</sub> in the text of this paper.

Jing Xu, Ziyin Zhang, Xiujuan Zhao, Siyu Cheng, Downward trend of NO<sub>2</sub> in the urban areas of Beijing-Tianjin-Hebei region from 2014 to 2020: Comparison of satellite retrievals, ground observations, and

emission inventories, Atmospheric Environment, Volume 295, 2023, 119531, <https://doi.org/10.1016/j.atmosenv.2022.119531>.

Response 12: We thank the reviewer for the suggestion. We have added information related to NO<sub>2</sub> trends in the updated manuscript in Line 296-301 as

“A study by Pavel et al. (2021) on yearly trend analysis of NO<sub>2</sub> for Dhaka showed a statistically significant positive annual slope  $0.47 \pm 0.03$  ppb-year<sup>-1</sup> for the studied period between 2003-2019 **which represent an increase in NO<sub>2</sub> levels of ~68% in 2019 from the base year in 2003 and a similar positive trend was observed by Georgoulias et al. (2019) as  $0.29 \pm 0.02$  molecules-cm<sup>-2</sup>-year<sup>-1</sup> or  $0.05 \pm 0.00 \times 10^{-4}$  mol-m<sup>-2</sup>-year<sup>-1</sup> between 1996-2017. The same study by Georgoulias et al. (2019) also revealed a statistically significant positive trend  $0.17 \pm 0.09$  molecules-cm<sup>-2</sup>-year<sup>-1</sup> or  $0.03 \pm 0.01$  mol-m<sup>-2</sup>-year<sup>-1</sup> in NO<sub>2</sub> values for Mexico City.**”

and Line 321-325 as

“Georgoulias et al., (2019) found a decreasing trend of  $-1.28 \pm 0.78$  molecules-cm<sup>-2</sup>-year<sup>-1</sup> or  $0.21 \pm 0.13 \times 10^{-4}$  mol-m<sup>-2</sup>-year<sup>-1</sup> in tropospheric NO<sub>2</sub> from 2011-2018 (2011 being the year of trend reversal from positive to negative trend). Another study by Xu et al. (2023) on NO<sub>2</sub> trend analysis in Beijing-Tianjin-Hebei between 2014-2020 also revealed a decreasing trend in NO<sub>2</sub> as overall reduction of 44.4% with reference to the year 2014.”

Comment 13: Line 343-344: You had suggested earlier in the manuscript that the AE(440-870) and AE (380-675) were both computed from 2 wavelengths. However in the AERONET products the AE are computed from 3 or more wavelengths plus the 380-675 nm AE is not even provided as a product from the AERONET web page. In order to be more useful to the scientific community the AE in this manuscript should be computed in the same methodology as done by AERONET and with the same wavelength limits.

Response 13: We thank the reviewer for this suggestion. Following the reviewer’s comment, we have updated the methodology as well as the wavelength pairs used for AE calculation. We now use the linear regression in logarithmic coordinates using all 4 and 3 wavelengths for AE440-870 and AE340-440, respectively. Instead of 380-675, we now use 340-440 as we have expanded the analysis of AOD from 380 nm and 440 nm to 340 nm, 380 nm, 440 nm and 500 nm (as also described in Response 4).

Comment 14: Line 351-352: This should be written a little more clearly. In fact there are no PGN NO<sub>2</sub> corrections made at 675 and 870 due to the fact that there is no NO<sub>2</sub> absorption at those wavelengths (not just that the corrections are not made). It is important to also include the effects of NO<sub>2</sub> biases from OMic at 340 and 500 nm in this paper.

Response 14: We agree with the reviewer and the NO<sub>2</sub> biases at 340 nm and 500 nm are included in the updated manuscript for both AOD and AE calculations as described in Response 3, Response 4 and Response 13 and have also corrected the referred sentence in Line 406-411 as below.

“In our case, there is no error at higher wavelength (870 nm and 675 nm, as these **wavelengths are not affected by NO<sub>2</sub> absorption and hence** PGN NO<sub>2</sub> corrections are not made) and the higher relative positive error at shorter wavelength (440 nm and 500 nm) leads to a shift in the peak of the AE **difference ( $\Delta$ AE440-870) distribution towards a positive value and the peak of the distribution of  $\Delta$ AE340-440 is towards the other direction** than that of  $\Delta$ AE440-870 **as the error in this case is higher at higher wavelength (440**

nm) than at lower wavelength (340) in case 1 and a similar but opposite behaviour is observed for case 2.”

Comment 15: Line 354-356: Yes indeed, therefore it would also be useful to show scatterplots of the AE differences as a function of AOD and as a function of NO<sub>2</sub> amount for a few of the sites with the largest biases.

Response 15: We thank the reviewer for this suggestion following which we have added Figure 9 (below Figure v) and the following explanation in the updated version of the manuscript in Line 413-419.

“Figure 9 shows the variation of AE differences with NO<sub>2</sub> VCD and AOD values. For NO<sub>2</sub> underestimations cases and with reference to NO<sub>2</sub> VCD (Figure 9a-f), there is a strong positive bias in AE440-870 (i.e., higher AE estimation from AEROENT as compared to PGN corrected AOD based AE estimation) and a negative bias in AE340-440 while for NO<sub>2</sub> overestimation cases (Figure 9g-j), the positive and negative biases are not that strongly present as is in the case of NO<sub>2</sub> underestimation. Looking into the AE differences variation with respect to AOD, it was found that high AE differences are associated with low AOD instances.”

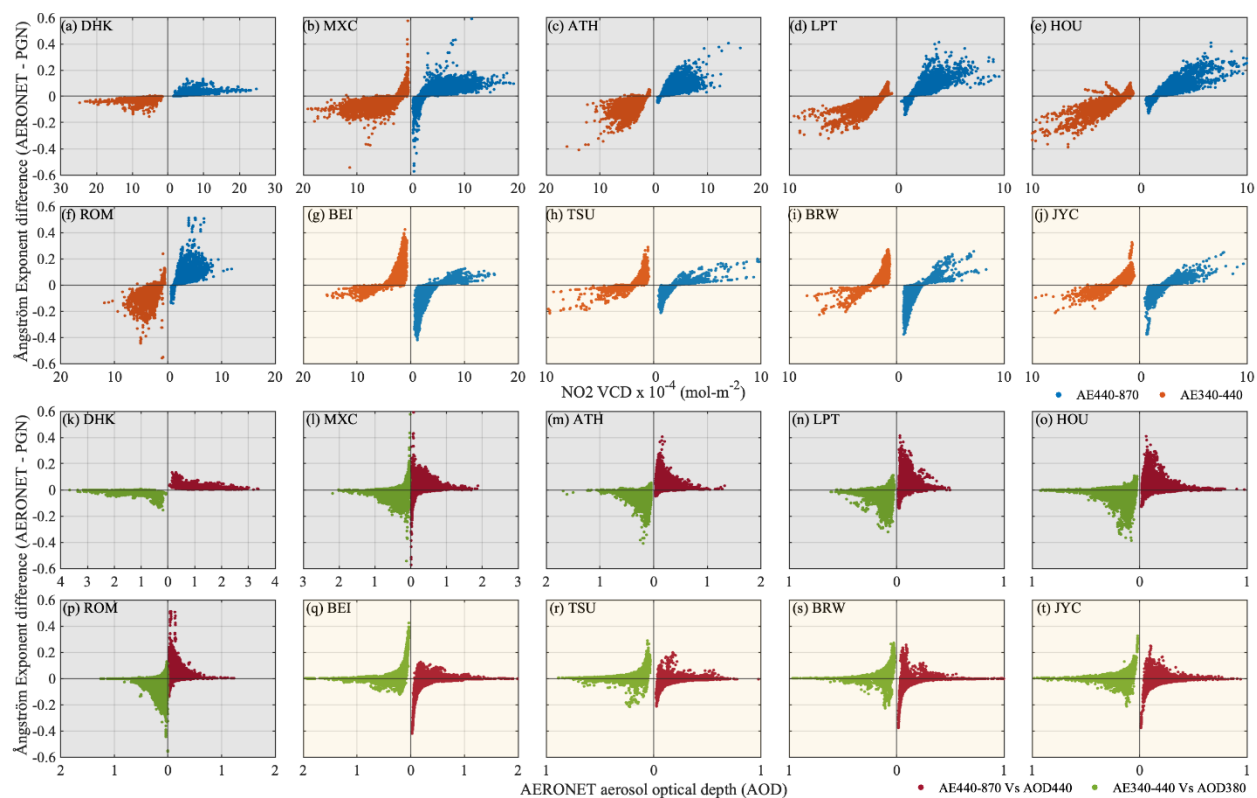

Figure v: Scatterplot of Angstrom exponent (AE) difference at 440-870 nm and 380-500 nm calculated from the AODs based on AERONET OMic and PGN NO<sub>2</sub> corrected AOD as a function of (a-j) PGN NO<sub>2</sub> VCD (mol-m<sup>-2</sup>), and (k-t) AOD at 440 nm and 380 nm, respectively. Shaded background area represents NO<sub>2</sub> underestimation (grey), and overestimation (yellow) cases.

Comment 16: Line 371-373: This section is somewhat confusing since trends are only computed using the AERONET V3 AOD and AE values. The co-located PGN values of NO<sub>2</sub> are not available for any sites for

a long enough time period to actually compute the effect of correcting for NO<sub>2</sub> biases on trends by including PGN data. I would suggest that this section could be removed from the paper since the effect of using PGN data on trends is not possible. Alternatively, the effect of using OMId versus OMic (daily OMI and perhaps also daily TOMS versus OMI climatology) could actually provide something of a possible correction for NO<sub>2</sub> effects on AOD to trends in AOD and AE.

Response 16: We thank the reviewer for the comment. We included this section in this manuscript in order to get an idea about the AOD trend using AERONET original AOD values and how close the trend values are to the mean AOD overestimation/underestimation so as to have an indication that the NO<sub>2</sub> based AOD correction might have impact on the trends when calculated with the corrected AOD values.

We could not make this analysis with NO<sub>2</sub> corrected AOD as we do not have long term measurements and the trend analysis presented in Section 3.4 is just indicative of how NO<sub>2</sub> correction could potentially affect realistic AOD trends. Long term AOD V3 data and satellite related correction or longer time series from Pandora measurements is needed for such analysis which cannot be covered in this manuscript due to data unavailability. Also, OMId based trend calculation in this manuscript will be slightly out of the scope of the main objective of the manuscript to use “real” ground based NO<sub>2</sub> measurements. Hence, we have made the following corrections in the updated manuscript in Lines 437 and Lines 438-440 as

**“It is indicative of how NO<sub>2</sub> correction could potentially affect realistic AOD trends.”**

and

**“This analysis signifies the importance of having correct (real) NO<sub>2</sub> values for optical depth calculations that can impact the trend analysis of AOD and AE, however the true scenario can be unveiled when the trends are calculated with NO<sub>2</sub> corrected AOD.”**

Comment 17: Line 434-443: This seems particularly weak to include the discussion on trends in the conclusions since no corrections for NO<sub>2</sub> biases could actually be applied to the data due to the short duration of the available PGN data sets (as shown in Table 1).

Response 17: We agree with the reviewer and have updated this paragraph as below in Lines 504-511

**“An AOD and AE trend assessment was made for about a decade for stations with AOD differences above 0.002 and with more than 5 years of data availability based on the original (based on AERONET OMI climatological NO<sub>2</sub>) AERONET AOD. Station having comparable mean AOD overestimation or underestimation with the estimated trends revealed that if the trends can be calculated for these stations with the NO<sub>2</sub> corrected AOD, there can be impacts on the trend values. This analysis is an indication on how NO<sub>2</sub> correction could potentially affect realistic AOD trends. However, the true scenario can be unveiled only with the trends that are calculated with NO<sub>2</sub> corrected AOD values. For future analysis, it would be interesting to see how the NO<sub>2</sub> based AOD correction would impact the AOD and AE trends i.e., how much would the trends deviate when using the corrected AODs.”**

Comment 18: Line 447-448: It would be important to know if these high NO<sub>2</sub> cases are associated with high AOD and therefore a smaller relative percentage of total AOD as opposed to absolute differences in AOD which you present.

Response 18: We thank the reviewer for this suggestion. The high NO<sub>2</sub> difference cases are not associated with high AOD cases but are related to high levels of pollution and/or changes in the pollution trends in the past decade. Figure vi presents the scatterplot of AERONET AOD as well as AOD percentage difference with 10% highest NO<sub>2</sub> difference cases (as presented in Section 3.2). It is seen that the AOD percentage difference varies between  $\pm 40\%$ . However, since absolute AOD changes are the ones used for radiative forcing studies such large changes will directly affect aerosol effects on solar radiation.

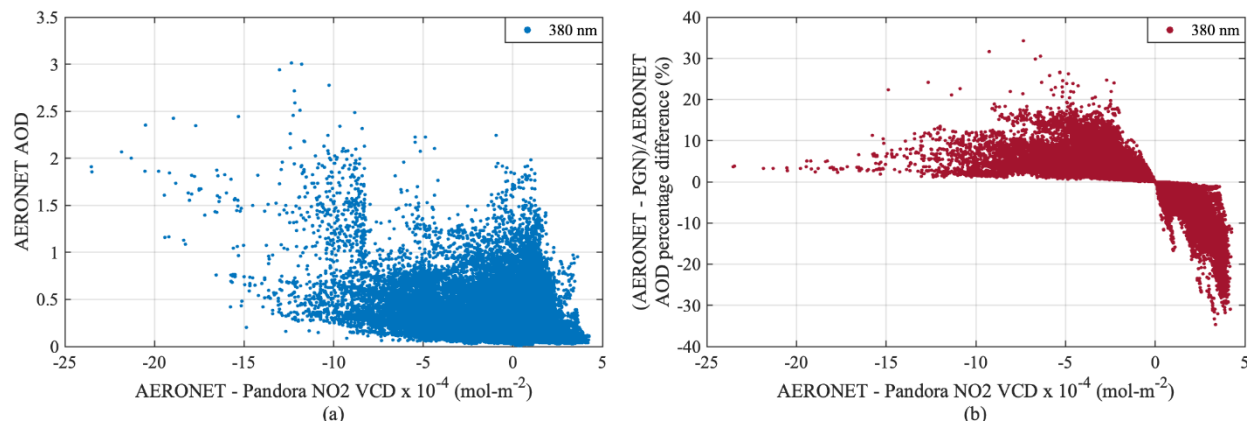

**Figure vi: AERONET (a) AOD and (b) AOD percentage difference as a function of 10% highest NO<sub>2</sub> VCD difference cases for 10 stations (DHK, MXC, ATH, LPT, HOU, ROM, SPR, ALD, SOL, BEI) with AOD differences at the limit or greater than 0.01.**

Following the suggestion of the reviewer, we looked into the relative percentage differences for all cases and all stations as well that we summarize in Table ii below and Table A4 in Appendix of the updated manuscript.

**Table ii: Comparison between NO<sub>2</sub> optical depth based bias and relative percentage differences in AOD at 380 nm.**

| Station | NO <sub>2</sub> underestimation case |          |                  | Station | NO <sub>2</sub> overestimation case |          |                  |
|---------|--------------------------------------|----------|------------------|---------|-------------------------------------|----------|------------------|
|         | Mean AOD bias                        | Mean AOD | % AOD difference |         | Mean AOD bias                       | Mean AOD | % AOD difference |
| LPT     | 0.011                                | 0.168    | 6.55             | BEI     | -0.013                              | 0.083    | -15.66           |
| ATH     | 0.016                                | 0.280    | 5.71             | MNH     | -0.006                              | 0.066    | -9.09            |
| HOU     | 0.011                                | 0.209    | 5.26             | NHV     | -0.004                              | 0.044    | -9.09            |
| MXC     | 0.022                                | 0.536    | 4.10             | BOU     | -0.003                              | 0.035    | -8.57            |
| SPR     | 0.009                                | 0.230    | 3.91             | BRW     | -0.005                              | 0.062    | -8.06            |
| HEL     | 0.005                                | 0.134    | 3.73             | SOL     | -0.008                              | 0.201    | -3.98            |
| ROM     | 0.009                                | 0.254    | 3.54             | JYC     | -0.006                              | 0.152    | -3.95            |
| ALD     | 0.009                                | 0.254    | 3.54             | WAL     | -0.003                              | 0.076    | -3.95            |
| GRN     | 0.005                                | 0.157    | 3.18             | BRU     | -0.005                              | 0.136    | -3.68            |
| INN     | 0.005                                | 0.158    | 3.16             | TSU     | -0.005                              | 0.154    | -3.25            |
| DHK     | 0.037                                | 1.588    | 2.33             | EGB     | -0.002                              | 0.072    | -2.78            |
| TOR     | 0.007                                | 0.303    | 2.31             | HAM     | -0.002                              | 0.082    | -2.44            |
| ATL     | 0.006                                | 0.288    | 2.08             | LDB     | -0.002                              | 0.107    | -1.87            |
| NYA     | 0.002                                | 0.109    | 1.83             | COM     | -0.001                              | 0.057    | -1.75            |
| TEL     | 0.006                                | 0.328    | 1.83             | ULS     | -0.004                              | 0.229    | -1.75            |
| DLG     | 0.001                                | 0.170    | 0.59             | DAV     | -0.001                              | 0.072    | -1.39            |

|     |        |       |       |
|-----|--------|-------|-------|
| IZA | -0.001 | 0.098 | -1.02 |
|-----|--------|-------|-------|

We found that e.g., at 380 nm, DHK has mean  $\Delta\text{AOD} = 0.037$ , mean  $\text{AOD} = 1.588$  leading to 2.33% difference. While ROM having mean  $\Delta\text{AOD} = 0.009$  and mean  $\text{AOD} = 0.254$  showed 3.54% difference. Moreover, BEI with mean  $\Delta\text{AOD} = -0.013$  and mean  $\text{AOD} = 0.083$  had 15.66% difference. In these three cases, BEI seems to be the worst case followed by ROM and DHK while considering the relative AOD percentages that can be slightly deceptive (as optical depth values can range from fractions to greater than 1 value as is the case here (mean  $\text{AOD} < 1$  for ROM and BEI, and mean  $\text{AOD} > 1$  for DHK)). Another issue with using percentages is that stations like BOU which is a “rural” site (less polluted) as considered in this analysis (Please refer to Comment 1 and Response 1) is showing % AOD difference of ~9% while “urban” site (high pollution levels) like DHK is having ~2%. However, considering the absolute differences, DHK is the worst case followed by BEI and ROM which is a more realistic scenario as DHK and BEI are in the high pollution zone which is why we have used absolute differences for analyzing  $\text{NO}_2$  absorption impact on AOD observations. Regarding the concern of the reviewer, we have added absolute AOD values in the analysis e.g., in Figure 2, Figure 4, Figure 5 and Table 3, in order to have an idea of the absolute AOD levels associated with the AOD differences.

Also, even though %AOD difference for DHK is ~2% (which is also high considering the fact that it is ground truth which is used for satellite and model data validations), the bias of 0.037 cannot be ignored considering the fact and as reported by Giles et al., 2019 and Eck et al., 1999, that the uncertainty in AOD estimation by AERONET is found to be ~0.01 with higher uncertainty being associated with calibration at lower wavelengths (in UV region). However, it is to note here that for some stations the deviation from  $\text{NO}_2$  absorption is close to this uncertainty limit or higher than this limit which is comparable to calibration introduced uncertainty that tends to adversely affect the accuracy of the AOD estimations. It is also to note here that we could not have these comparisons at any of the station of the Indian subcontinent (no data availability from PGN) which has cities with high pollution levels where these deviations can be close to or even higher than what we observed for Dhaka.

The lines 447-448 of the earlier version of the manuscript has been updated as below in the updated version in Line 514-518.

“However, in the case of high  $\text{NO}_2$  events (days) such **differences** are important, as for the top 10% number of high  $\text{NO}_2$  cases (these high  $\text{NO}_2$  difference cases are not associated with high AOD cases but are related to high levels of pollution and/or changes in the pollution trends in the past decade (Appendix Figure A4)), for 10 of the stations the impact on AODs is close to the limit or higher than the reported 0.01 uncertainty by Giles et al., (2019) and Eck et al., (1999) for AERONET AOD measurement.”

Comment 19: Line 475, Figure A1, caption: “The numbers in the legend represent the ratio of mean optical depth difference...” I do not see any numbers in the legend of Figure A1, please add them or clarify.

Response 19: We thank the reviewer for pointing out this mistake. This figure is now updated and moved to the main text as Figure 4 and we have corrected this mistake by removing this line from the figure caption.



## References

- Eck, T. F., Holben, B. N., Reid, J. S., Dubovik, O., Smirnov, A., O'Neill, N. T., Slutsker, I., and Kinne, S.: Wavelength dependence of the optical depth of biomass burning, urban, and desert dust aerosols, *J. Geophys. Res.*, 104, 31333–31349, <https://doi.org/10.1029/1999JD900923>, 1999.
- Georgoulas, A. K., van der A, R. J., Stammes, P., Boersma, K. F., and Eskes, H. J.: Trends and trend reversal detection in 2 decades of tropospheric NO<sub>2</sub> satellite observations, *Atmos. Chem. Phys.*, 19, 6269–6294, <https://doi.org/10.5194/acp-19-6269-2019>, 2019.
- Giles, D. M., Sinyuk, A., Sorokin, M. G., Schafer, J. S., Smirnov, A., Slutsker, I., Eck, T. F., Holben, B. N., Lewis, J. R., Campbell, J. R., Welton, E. J., Korkin, S. V., and Lyapustin, A. I.: Advancements in the Aerosol Robotic Network (AERONET) Version 3 database-automated near-real-time quality control algorithm with improved cloud screening for Sun photometer aerosol optical depth (AOD) measurements, *Atmos. Meas. Tech.*, 12, 169–209, <https://doi.org/10.5194/amt-12-169-2019>, 2019.
- Pavel, M. R. S., Zaman, S. U., Jeba, F., Islam, M. S., Salam, A. Long-Term (2003–2019) Air Quality, Climate Variables, and Human Health Consequences in Dhaka, Bangladesh, *Front. Sustain. Cities*, 3, 681759, <https://doi.org/10.3389/frsc.2021.681759>, 2021.
- Xu, J., Zhang, Z., Zhao, X., and Cheng, S.: Downward trend of NO<sub>2</sub> in the urban areas of Beijing-Tianjin-Hebei region from 2014 to 2020: Comparison of satellite retrievals, ground observations, and emission inventories, *Atmos. Environ.*, 295, 119531, <https://doi.org/10.1016/j.atmosenv.2022.119531>, 2023.

We are extremely thankful to the reviewer for providing valuable comments and suggestions that helped us improve the quality of the manuscript manifold.
